# Supplementary material for: Divergent responses of plant growth forms to climate and urban expansion
Source: Research Square preprint supplement (doi:10.21203/rs.3.rs-7058899/v1), 2025-09-11
Supplement: Supplementary file 1 [file d1e3f897ec72423509fa6d4e.docx]

Supplementary information

**Table S1** Model summary of the Bayesian Dirichlet regression models with life forms of spontaneous plant species. MAT-mean annual temperature; RGDP-real gross domestic product per capita; Sealed.city- the proportion of sealed surface in each city.

| Regression Coefficients | Estimate | Est.Error | l-95% CI | u-95% CI | Rhat | Bulk_ESS | Tail_ESS |
| --- | --- | --- | --- | --- | --- | --- | --- |
| mu2_Intercept | 0.41 | 0.01 | 0.38 | 0.44 | 1.00 | 8760.56 | 4936.38 |
| mu3_Intercept | -0.40 | 0.04 | -0.49 | -0.31 | 1.00 | 3011.35 | 4469.29 |
| mu2_MAT | -0.07 | 0.02 | -0.11 | -0.04 | 1.00 | 8806.26 | 6437.74 |
| mu2_RGDP | 0.02 | 0.02 | -0.01 | 0.06 | 1.00 | 7225.58 | 5654.85 |
| mu2_Sealed.city | 0.02 | 0.02 | -0.02 | 0.05 | 1.00 | 7751.52 | 6120.02 |
| mu2_City.size | -0.04 | 0.02 | -0.07 | 0.00 | 1.00 | 6606.08 | 5825.46 |
| mu3_MAT | 0.09 | 0.05 | 0.00 | 0.19 | 1.00 | 2711.02 | 3836.56 |
| mu3_RGDP | 0.04 | 0.05 | -0.07 | 0.15 | 1.00 | 2814.55 | 3941.42 |
| mu3_Sealed.city | 0.01 | 0.05 | -0.09 | 0.11 | 1.00 | 2902.95 | 3887.21 |
| mu3_City.size | -0.30 | 0.06 | -0.43 | -0.18 | 1.00 | 3468.32 | 4220.80 |

**Table S2** Model compare of the top five Bayesian Dirichlet regression models with life forms of spontaneous plant species. RH-relative humidity; UR.city-Sealed surface expansion rate of each city (i.e., urbanization rate); Light.site-Night light intensity in each site; ELPD_LOO-Expected Log Predictive Density via leave-one-out; P_LOO-effective number of parameters (model complexity) estimated under LOO; LOOIC- Leave-One-Out Information Criterion (−2 × ELPD_LOO, lower is better)

| Top 5 models | ELPD_LOO | P_LOO | LOOIC |
| --- | --- | --- | --- |
| Y ~ MAT + RGDP + Sealed.city + City.size + (1 | cityid/siteid) | 760.84 | 181.50 | -1521.68 |
| Y ~ MAT + RH + RGDP + City.size + (1 | cityid/siteid) | 759.58 | 182.92 | -1519.16 |
| Y ~ MAT + RH + UR.city + City.size + (1 | cityid/siteid) | 759.18 | 180.65 | -1518.36 |
| Y ~ MAT + UR.city + light.site + (1 | cityid/siteid) | 759.17 | 180.57 | -1518.35 |
| Y ~ MAT + UR.city + light.site + (1 | cityid/siteid) | 758.91 | 179.31 | -1517.82 |
